# Supplementary material
Source: ML conference proceedings conference paper supplement (https://aclanthology.org/2026.semeval-1.163)
Supplement: SupplementaryMaterial [file prompts_fixed.pdf › prompts_fixed.pdf]

# Prompt Templates Used for Training (DimASQP)

| Lang_Domain    | Instruction                                                                                                                                                                                                                                                                                                                                                                                                                                                                                                                                                                                                                                                                                                                                                                                                                                                                                                                                                                                                                                                                                                                                                                                                                                                                                                                                                                                                                                                                                                                     | Training chat template (user + assistant)                                                                                                                                                                                        |
|----------------|---------------------------------------------------------------------------------------------------------------------------------------------------------------------------------------------------------------------------------------------------------------------------------------------------------------------------------------------------------------------------------------------------------------------------------------------------------------------------------------------------------------------------------------------------------------------------------------------------------------------------------------------------------------------------------------------------------------------------------------------------------------------------------------------------------------------------------------------------------------------------------------------------------------------------------------------------------------------------------------------------------------------------------------------------------------------------------------------------------------------------------------------------------------------------------------------------------------------------------------------------------------------------------------------------------------------------------------------------------------------------------------------------------------------------------------------------------------------------------------------------------------------------------|----------------------------------------------------------------------------------------------------------------------------------------------------------------------------------------------------------------------------------|
| eng_restaurant | <p>You are an expert sentiment analysis tool. Your task is to extract all ↪ quadruplets from the given review.</p> <p>Here are the rules:</p> <ol style="list-style-type: none"><li>1. You MUST format your answer as a single, valid JSON list of objects.</li><li>2. Each object MUST have the keys: 'Aspect', 'Category', 'Opinion', ↪ 'Valence', and 'Arousal'.</li><li>3. 'Aspect' and 'Opinion' MUST be exact substrings from the input text.<ul style="list-style-type: none"><li>- Copy the text EXACTLY as it appears, including spacing, ↪ punctuation errors, or typos.</li><li>- Do NOT correct or normalize the text.</li></ul></li><li>3b. Always try your best to find explicit 'Aspect' and 'Opinion' ↪ mentions.<ul style="list-style-type: none"><li>- The 'Opinion' may appear before or after the 'Aspect' in the ↪ text; always extract the full 'Aspect' and 'Opinion', ↪ regardless of order in the sentence.</li><li>- Use 'NULL' only if a real 'Aspect' or 'Opinion' span truly does ↪ not exist.</li></ul></li><li>3c. 'Opinion' MUST be complete and include all adjectives, negations, ↪ and modifiers.</li><li>4. 'Category' MUST be one of the following values: [{CATEGORIES}].</li><li>5. 'Valence' and 'Arousal' MUST be numbers from 1.00 to 9.00, with up ↪ to two decimal places.</li><li>6. Your entire response MUST be *only* the JSON list.</li></ol> <p>Now, perform the task for the following review:</p>                                                                           | <pre>&lt; begin_of_text &gt;&lt; start_header_id &gt;user&lt; end_header_id &gt;  {instruction}  Review: "{text}"&lt; eot_id &gt;  &lt; start_header_id &gt;assistant&lt; end_header_id &gt; {answer_json}&lt; eot_id &gt;</pre> |
| eng_laptop     | <p>You are an expert sentiment analysis tool. Your task is to extract all ↪ quadruplets from the given review.</p> <p>Here are the rules:</p> <ol style="list-style-type: none"><li>1. You MUST format your answer as a single, valid JSON list of objects.</li><li>2. Each object MUST have the keys: 'Aspect', 'Category', 'Opinion', ↪ 'Valence', and 'Arousal'.</li><li>3. 'Aspect' and 'Opinion' MUST be exact substrings from the input text.<ul style="list-style-type: none"><li>- Copy the text EXACTLY as it appears, including spacing, ↪ punctuation errors, or typos.</li><li>- Do NOT correct or normalize the text.</li></ul></li><li>3b. Always try your best to find explicit 'Aspect' and 'Opinion' ↪ mentions.<ul style="list-style-type: none"><li>- The 'Opinion' may appear before or after the 'Aspect' in the ↪ text; always extract the full 'Aspect' and 'Opinion', ↪ regardless of order in the sentence.</li><li>- Use 'NULL' only if a real 'Aspect' or 'Opinion' span truly does ↪ not exist.</li></ul></li><li>3c. 'Opinion' MUST be complete and include all adjectives, negations, ↪ and modifiers.</li><li>3d. 'Aspect' MUST be complete and include descriptive adjectives.</li><li>4. 'Category' MUST be one of the following values: [{CATEGORIES}].</li><li>5. 'Valence' and 'Arousal' MUST be numbers from 1.00 to 9.00, with up ↪ to two decimal places.</li><li>6. Your entire response MUST be *only* the JSON list.</li></ol> <p>Now, perform the task for the following review:</p> | <pre>&lt; begin_of_text &gt;&lt; start_header_id &gt;user&lt; end_header_id &gt;  {instruction}  Review: "{text}"&lt; eot_id &gt;  &lt; start_header_id &gt;assistant&lt; end_header_id &gt; {answer_json}&lt; eot_id &gt;</pre> |
| zho_restaurant | <p>你是一個精準且嚴格的中文情感四元組抽取模型。</p> <p>你的任務是從評論中抽取所有可能且明確存在的四元組，</p> <p>↪ 並且不要遺漏任何明確的 Aspect-Opinion 組合，同時嚴格避免假陽性。</p> <p>每個四元組包含以下欄位（欄位順序必須固定）：</p> <p>"Aspect"（評論中出現的詞，必須完全照抄原文字串）</p> <p>"Category"（必須與 {CATEGORIES} 中的某一項完全一致，不可創造、</p> <p>↪ 改寫或合併新分類）</p> <p>"Opinion"（完整且連續描述該 Aspect 的情緒片段，必須完全照抄原文字串，</p> <p>↪ 包括所有否定、程度、副詞或連續修飾語）</p> <p>"Valence"（情緒正負強度，1.00-9.00，小數兩位，</p> <p>↪ 基於語義強度的主觀連續估計）</p> <p>"Arousal"（情緒喚起強度，1.00-9.00，小數兩位，</p> <p>↪ 基於語義強度的主觀連續估計）</p> <p>請遵守以下規則：</p> <ol style="list-style-type: none"><li>1. 輸出必須是一個 JSON 陣列，不得包含任何非 JSON 文字</li><li>2. Aspect 與 Opinion 必須完全照抄原文，不可修改、標準化、裁切或推測</li><li>3. 若評論中存在多個不同的 Aspect 或 Opinion，需分別生成多個 JSON 物件；</li><li>↪ 若同一 Aspect 對應多個不同 Opinion，也需分別生成多個四元組</li><li>4. 僅當評論中存在明確情緒表達，但無法在原文中找到任何可對應的 Aspect 或</li><li>↪ Opinion 文字片段時，才允許填寫 "NULL"</li><li>5. 若評論中不存在任何明確可抽取的情感四元組，輸出空陣列 []</li><li>6. 嚴格避免假陽性：僅在 Aspect 與 Opinion</li><li>↪ 均在原文中明確存在時才生成四元組</li><li>7. 請檢查評論中所有可能的 Aspect-Opinion 組合，</li><li>↪ 務必完整覆蓋所有明確表達的情感</li><li>8. 僅輸出 JSON，不要附加任何說明、分析或解釋</li></ol> <p>請根據以下評論抽取情感四元組：</p>                                                                                                                                                                                                                                                                                                                                                                                                                                                        | <pre>&lt; im_start &gt;user {instruction}  評論: "{text}" &lt; im_end &gt; &lt; im_start &gt;assistant {answer_json} &lt; im_end &gt;</pre>                                                                                        |

Continued on next page.

| Lang/Domain    | Instruction (original prompt)                                                                                                                                                                                                                                                                                                                                                                                                                                                                                                                                                                                                                                                                                                                                                                                                                                                                                                                                                                                                                                                                                                                                                                                                                         | Training chat template (user + assistant)                                                                                                     |
|----------------|-------------------------------------------------------------------------------------------------------------------------------------------------------------------------------------------------------------------------------------------------------------------------------------------------------------------------------------------------------------------------------------------------------------------------------------------------------------------------------------------------------------------------------------------------------------------------------------------------------------------------------------------------------------------------------------------------------------------------------------------------------------------------------------------------------------------------------------------------------------------------------------------------------------------------------------------------------------------------------------------------------------------------------------------------------------------------------------------------------------------------------------------------------------------------------------------------------------------------------------------------------|-----------------------------------------------------------------------------------------------------------------------------------------------|
| zho_laptop     | <p>你是一個精準且嚴格的中文情感四元組抽取模型。</p> <p>你的任務是從評論中抽取所有可能且明確存在的四元組，</p> <p>↳ 並且不要遺漏任何明確的 Aspect-Opinion 組合，同時嚴格避免假陽性。</p> <p>每個四元組包含以下欄位（欄位順序必須固定）：</p> <p>"Aspect"（評論中出現的詞，必須完全照抄原文字串）</p> <p>"Category"</p> <p>"Opinion"（完整且連續描述該 Aspect 的情緒片段，必須完全照抄原文字串，</p> <p>↳ 包括所有否定、程度、副詞或連續修飾語）</p> <p>"Valence"（情緒正負強度，1.00-9.00，小數兩位，</p> <p>↳ 基於語義強度的主觀連續估計）</p> <p>"Arousal"（情緒喚起強度，1.00-9.00，小數兩位，</p> <p>↳ 基於語義強度的主觀連續估計）</p> <p>請遵守以下規則：</p> <ol style="list-style-type: none"><li>輸出必須是一個 JSON 陣列，不得包含任何非 JSON 文字</li><li>Aspect 與 Opinion 必須完全照抄原文，不可修改、標準化、裁切或推測</li><li>若評論中存在多個不同的 Aspect 或 Opinion，需分別生成多個 JSON 物件；</li><li>↳ 若同一 Aspect 對應多個不同 Opinion，也需分別生成多個四元組</li><li>僅當評論中存在明確情緒表達，但無法在原文中找到任何可對應的 Aspect 或</li><li>↳ Opinion 文字片段時，才允許填寫 "NULL"</li><li>若評論中不存在任何明確可抽取的情感四元組，輸出空陣列 []</li><li>嚴格避免假陽性：僅在 Aspect 與 Opinion</li><li>↳ 均在原文中明確存在時才生成四元組</li><li>請檢查評論中所有可能的 Aspect-Opinion 組合，</li><li>↳ 務必完整覆蓋所有明確表達的情感</li><li>僅輸出 JSON，不要附加任何說明、分析或解釋</li></ol> <p>請根據以下評論抽取情感四元組：</p>                                                                                                                                                                                                                                                          | <pre>&lt; im_start &gt;user {instruction}  評論: "{text}" &lt; im_end &gt; &lt; im_start &gt;assistant {answer_json} &lt; im_end &gt;</pre>     |
| jpn_hotel      | <p>あなたは日本語レビューから感情四つ組を抽出するモデルです。</p> <p>↳ 以下の規則に厳密に従い、</p> <p>↳ 入力テキストから四つ組をすべて抽出してください。</p> <p>↳ 【使用可能なカテゴリー一覧】{CATEGORIES} 【抽出項目】1. "Aspect"：</p> <p>↳ テキスト内に実際に出現する対象語（原文を一字一句そのまま抽出）2.</p> <p>↳ "Category"：上記カテゴリー一覧から最も適切なカテゴリー名を選択 3.</p> <p>↳ "Opinion"：Aspect に対する評価表現（原文をそのまま抽出し、否定・</p> <p>↳ 程度語も含める）4. "Valence"：感情の正負強度（1.00～9.00）5.</p> <p>↳ "Arousal"：感情の覚醒度（1.00～9.00） 【出力規則】 - JSON</p> <p>↳ 配列のみを出力し、余計な文字を一切含めないこと。 -</p> <p>↳ 原文に存在しない語句を作らないこと。 - 明確な Aspect または Opinion</p> <p>↳ がない場合は "NULL" を使用する。 -</p> <p>↳ 抽出すべき四つ組が存在しない場合は [] を返す。 -</p> <p>↳ 複数ある場合は要素を分けてすべて出力する。</p>                                                                                                                                                                                                                                                                                                                                                                                                                                                                                                                                                                                                                                                  | <pre>&lt; im_start &gt;user {instruction}  レビュー本文: "{text}" &lt; im_end &gt; &lt; im_start &gt;assistant {answer_json} &lt; im_end &gt;</pre> |
| rus_restaurant | <p>Вы — эксперт по анализу настроений. Ваша задача — извлечь все</p> <p>↳ эмоциональные четверки из данного пользовательского отзыва.</p> <p>Вот правила:</p> <ol style="list-style-type: none"><li>1. Вы ДОЛЖНЫ форматировать ответ как один корректный JSON-список</li><li>↳ объектов.</li><li>2. Каждый объект ДОЛЖЕН содержать ключи: 'Aspect', 'Category',</li><li>↳ 'Opinion', 'Valence' и 'Arousal'.</li><li>3. 'Aspect' и 'Opinion' ДОЛЖНЫ быть точными подстроками из исходного</li><li>↳ текста.</li><li>- Копируйте текст ТОЧНО как он есть, включая пробелы, пунктуацию и</li><li>↳ ошибки.</li><li>- НЕ исправляйте и не нормализуйте текст.</li><li>- 'Opinion' может идти перед или после 'Aspect'; извлекайте полные</li><li>↳ 'Aspect' и 'Opinion', независимо от порядка в предложении.</li><li>- 'Opinion' ДОЛЖНО быть полным, включая все прилагательные,</li><li>↳ отрицания и модификаторы.</li><li>4. 'Category' ДОЛЖЕН быть одним из следующих значений: [{CATEGORIES}].</li><li>5. 'Valence' и 'Arousal' ДОЛЖНЫ быть числами от 1.00 до 9.00 с</li><li>↳ точностью до двух знаков после запятой.</li><li>6. Ваш ответ должен содержать *только* JSON-список.</li></ol> <p>Теперь выполните задачу для следующего отзыва:</p> | <pre>&lt; im_start &gt;user {instruction}  Отзыв: "{text}" &lt; im_end &gt; &lt; im_start &gt;assistant {answer_json} &lt; im_end &gt;</pre>  |

Continued on next page.

| Lang/Domain    | Instruction (original prompt)                                                                                                                                                                                                                                                                                                                                                                                                                                                                                                                                                                                                                                                                                                                                                                                                                                                                                                                                                                                                                                                                                                                                                                                                                                                                                                                                                                                                                                                       | Training chat template (user + assistant)                                                                                                             |
|----------------|-------------------------------------------------------------------------------------------------------------------------------------------------------------------------------------------------------------------------------------------------------------------------------------------------------------------------------------------------------------------------------------------------------------------------------------------------------------------------------------------------------------------------------------------------------------------------------------------------------------------------------------------------------------------------------------------------------------------------------------------------------------------------------------------------------------------------------------------------------------------------------------------------------------------------------------------------------------------------------------------------------------------------------------------------------------------------------------------------------------------------------------------------------------------------------------------------------------------------------------------------------------------------------------------------------------------------------------------------------------------------------------------------------------------------------------------------------------------------------------|-------------------------------------------------------------------------------------------------------------------------------------------------------|
| ukr_restaurant | <p>Ти є високоточним інструментом аспектно-орієнтованого аналізу</p> <p>↪ тональності.</p> <p>Твоє завдання — витягнути всі релевантні чотирики (Aspect-Category-Opinion-Valence-Arousal) з поданого тексту відгуку.</p> <p>Правила:</p> <ol style="list-style-type: none"><li>Відповідь має бути єдиним валідним JSON-масивом об'єктів.</li><li>Кожен об'єкт відповідає одній парі Aspect-Opinion, що виражає одну окрему оцінку.</li><li>Кожен об'єкт повинен містити рівно такі ключі: "Aspect", "Category", "Opinion", "Valence", "Arousal".</li><li>"Aspect" і "Opinion" повинні бути точними підрядками з тексту відгуку — копіюй символ у символ, без змін, нормалізації чи перефразування.</li><li>"Opinion" має включати всі прикметники, заперечення та підсилювачі, що формують емоційну оцінку аспекту.</li><li>"Category" повинна бути рівно одним значенням зі списку дозволених категорій: [{CATEGORIES}]. Жодні інші значення заборонені.</li><li>"Valence" і "Arousal" — дійсні числа від 1.00 до 9.00 включно, обов'язково з двома десятковими знаками. Valence: 1.00 — вкрай негативна, 9.00 — вкрай позитивна оцінка. Arousal: 1.00 — низька емоційна інтенсивність, 9.00 — дуже висока інтенсивність.</li><li>Якщо у відгуку немає жодної релевантної пари Aspect-Opinion, поверни порожній JSON-масив [].</li><li>Відповідь повинна містити лише JSON-масив — без пояснень, коментарів або будь-якого додаткового тексту.</li></ol> <p>Ось текст відгуку:</p> | <pre>&lt; im_start &gt;user {instruction}  Текст відгуку: "{text}" &lt; im_end &gt; &lt; im_start &gt;assistant {answer_json} &lt; im_end &gt;</pre>  |
| tat_restaurant | <p>Син — татар телендәге күзәтү текстларыннан аспект-дүртлекләرنе чыгару өчен махсуслашкан система.</p> <p>Түбәндәге кагыйдәләрне төгәл үтә:</p> <ol style="list-style-type: none"><li>Җавап БАҖЫ тик дөрес JSON-массив булырга тиеш, башка бернинди текст язма.</li><li>Һәр элементта мәҗбүри кырлар: "Aspect", "Category", "Opinion", "Valence", "Arousal".</li><li>"Aspect" һәм "Opinion" тексттан үзгәртүсез күчерелә.</li><li>"Aspect" һәм "Opinion" теләсә нинди тәртиптә очрый ала, ләкин текстта мөмкин булган һәр аспект-фикер парын аерым дүртлек итеп чыгару мәҗбүри.</li><li>"Opinion" барлык сыйфатларны, көчәйткечләрне һәм кире формаларны тулысынча эченә ала.</li><li>"Category" түбәндәгеләрнең берсе генә булырга тиеш: [{CATEGORIES}].</li><li>"Valence" һәм "Arousal" 1.00–9.00 диапазонында, ике дөңгеләк санга кадәр күрсәтелә.</li></ol> <p>Күзәтү тексты:</p>                                                                                                                                                                                                                                                                                                                                                                                                                                                                                                                                                                                              | <pre>&lt; im_start &gt;user {instruction}  Текст бәяләмәсе "{text}" &lt; im_end &gt; &lt; im_start &gt;assistant {answer_json} &lt; im_end &gt;</pre> |
